# Supplementary material for: High-resolution mapping demonstrates inhibition of DNA excision repair by transcription factors
Source: eLife. 2022 Mar 15;11:e73943. doi: 10.7554/eLife.73943 (PMC8970589; doi:10.7554/eLife.73943)
Supplement: Figure 1—source data 1. [file elife-73943-fig1-data1.xlsx]

## Sheet: Abf1_two_strands_G_formation_10
Distance_to_center	7meG_count_Abf1_mag1_0h	7meG_count_Abf1_naked	Cell_to_naked_ratio	Scaled_cell_to_naked_ratio
-498	1230.4	806	1.52655	1.05943
-493	1199.2	846.8	1.41615	0.982818
-488	1214.4	831.8	1.45997	1.01322
-483	1285.8	849.6	1.51342	1.05032
-478	1254.8	827	1.51729	1.05301
-473	1229.4	807.4	1.52267	1.05674
-468	1246.6	836	1.49115	1.03486
-463	1255.8	849.8	1.47776	1.02557
-458	1215.2	826.6	1.47012	1.02027
-453	1254.4	872.8	1.43721	0.997433
-448	1222.6	794.6	1.53864	1.06782
-443	1247.2	849.8	1.46764	1.01855
-438	1196.8	831.2	1.43985	0.99926
-433	1246	882	1.4127	0.980419
-428	1243.2	881.2	1.4108	0.979104
-423	1299.2	863.6	1.5044	1.04406
-418	1169.8	812.2	1.44029	0.999565
-413	1276.4	873.4	1.46142	1.01423
-408	1233.8	864.2	1.42768	0.990816
-403	1199.4	820.6	1.46161	1.01437
-398	1247.2	903.8	1.37995	0.957693
-393	1274.6	911.4	1.39851	0.970571
-388	1217.2	871.6	1.39651	0.969186
-383	1218.4	838	1.45394	1.00904
-378	1231	861	1.42973	0.992241
-373	1267.6	863.4	1.46815	1.0189
-368	1226.4	869	1.41128	0.979433
-363	1256.4	889.6	1.41232	0.980157
-358	1193.4	828	1.4413	1.00027
-353	1215.8	861.8	1.41077	0.97908
-348	1249.4	897.4	1.39224	0.966224
-343	1221.8	830.2	1.47169	1.02136
-338	1266	857.4	1.47656	1.02474
-333	1164.6	795.2	1.46454	1.0164
-328	1236.8	843.4	1.46645	1.01772
-323	1270.6	861.8	1.47436	1.02321
-318	1289.6	865.6	1.48983	1.03395
-313	1255.4	852	1.47347	1.0226
-308	1326	925	1.43351	0.994865
-303	1293.8	843	1.53476	1.06513
-298	1323.2	910	1.45407	1.00913
-293	1266.2	839.6	1.5081	1.04663
-288	1280.2	838.6	1.52659	1.05946
-283	1208.6	818	1.47751	1.0254
-278	1263.8	854	1.47986	1.02703
-273	1233	929	1.32723	0.921106
-268	1268.4	934	1.35803	0.942479
-263	1198.8	857.2	1.39851	0.97057
-258	1257.4	838.2	1.50012	1.04109
-253	1223.2	902.8	1.3549	0.940304
-248	1193.6	837.4	1.42536	0.98921
-243	1236.2	841.4	1.46922	1.01964
-238	1227.8	841.2	1.45958	1.01296
-233	1163.2	806.8	1.44175	1.00058
-228	1214.2	854.8	1.42045	0.985798
-223	1152.2	798.4	1.44314	1.00154
-218	1170	805.4	1.45269	1.00818
-213	1184.8	832.6	1.42301	0.987577
-208	1172.8	855.4	1.37105	0.951518
-203	1134.2	835.2	1.358	0.942457
-198	1149.6	869.2	1.3226	0.917888
-193	1205.2	840	1.43476	0.995732
-188	1205.2	828.8	1.45415	1.00919
-183	1197.6	835.8	1.43288	0.994425
-178	1120.2	787.8	1.42193	0.986829
-173	1152.2	809	1.42423	0.988421
-168	1186.6	803.6	1.47661	1.02477
-163	1164.8	792	1.47071	1.02068
-158	1167.6	826.6	1.41253	0.980305
-153	1265.6	864.8	1.46346	1.01565
-148	1187.6	836.6	1.41956	0.985178
-143	1277.6	842.6	1.51626	1.05229
-138	1395.4	1055.2	1.3224	0.917754
-133	1206.8	853	1.41477	0.981858
-128	1172.2	801.2	1.46306	1.01537
-123	1184.4	757	1.5646	1.08584
-118	1169.8	797	1.46775	1.01863
-113	1150.8	783.8	1.46823	1.01896
-108	1277	803	1.59029	1.10367
-103	1224.8	862	1.42088	0.986099
-98	1089.4	753.6	1.44559	1.00325
-93	1164.8	836.4	1.39264	0.966495
-88	1130	809	1.39679	0.969376
-83	1128.6	801.6	1.40793	0.977113
-78	986	688	1.43314	0.994606
-73	1068	821.2	1.30054	0.902578
-68	1037.4	735.2	1.41104	0.979272
-63	963	689	1.39768	0.969995
-58	1015.8	681.4	1.49075	1.03459
-53	935	703	1.33001	0.923036
-48	1021.8	700.6	1.45846	1.01218
-43	961.2	634.6	1.51465	1.05118
-38	906.6	649.8	1.3952	0.968274
-33	989.4	686.6	1.44101	1.00007
-28	914.6	675.6	1.35376	0.939516
-23	1011	727.6	1.3895	0.964319
-18	918.6	683.8	1.34338	0.932309
-13	1033	791.4	1.30528	0.905872
-8	1213	1366.4	0.887734	0.616092
-3	1232	1086.4	1.13402	0.787016
2	775.8	1001.4	0.774715	0.537656
7	675.8	487.2	1.38711	0.962661
12	999	680.6	1.46782	1.01868
17	977.2	717.2	1.36252	0.945596
22	1045.6	777.6	1.34465	0.933194
27	980.6	662.8	1.47948	1.02677
32	1083.2	753.2	1.43813	0.998069
37	1025.4	727.2	1.41007	0.978592
42	972.2	701.4	1.38608	0.96195
47	1031	778.8	1.32383	0.918745
52	1051.8	719.2	1.46246	1.01495
57	937.6	664.8	1.41035	0.978789
62	1144	837.4	1.36613	0.948103
67	1229	813.8	1.5102	1.04809
72	1145	818	1.39976	0.971437
77	1159.2	728.6	1.591	1.10416
82	1282.8	914.2	1.40319	0.973823
87	1135.6	793.8	1.43059	0.992834
92	1287	932.6	1.38001	0.957735
97	1354.2	881.4	1.53642	1.06628
102	1343.8	909.2	1.478	1.02574
107	1346.6	934	1.44176	1.00059
112	1331.6	906.6	1.46878	1.01934
117	1352.8	865	1.56393	1.08538
122	1372.2	846.2	1.6216	1.1254
127	1209	864.4	1.39866	0.970675
132	1206.8	809.4	1.49098	1.03475
137	1361.8	953.2	1.42866	0.991498
142	1304.6	834.2	1.56389	1.08535
147	1208.6	782.2	1.54513	1.07233
152	1294.6	830	1.55976	1.08248
157	1385.6	945.8	1.465	1.01672
162	1268.8	821.6	1.5443	1.07175
167	1199	836.8	1.43284	0.994397
172	1215	843.6	1.44026	0.999544
177	1264.4	878.6	1.43911	0.998748
182	1298.8	1003.2	1.29466	0.898498
187	1258.4	904.6	1.39111	0.965438
192	1203.4	853.4	1.41012	0.978633
197	1268.4	874.4	1.45059	1.00672
202	1155.2	798.8	1.44617	1.00365
207	1270	896	1.41741	0.98369
212	1214.6	828.6	1.46585	1.0173
217	1357.2	977.2	1.38887	0.96388
222	1203.2	817	1.47271	1.02206
227	1231	857.6	1.4354	0.996175
232	1302.4	861.6	1.51161	1.04906
237	1315.8	902.6	1.45779	1.01171
242	1196.8	839	1.42646	0.98997
247	1217.2	858.4	1.41799	0.98409
252	1319.4	882	1.49592	1.03817
257	1292.4	919	1.40631	0.975987
262	1305.8	955.4	1.36676	0.948536
267	1283.8	887	1.44735	1.00447
272	1271.6	901	1.41132	0.979463
277	1261.4	810.6	1.55613	1.07996
282	1282.8	894	1.4349	0.995827
287	1246.2	862.8	1.44437	1.0024
292	1258.4	875.4	1.43751	0.997642
297	1348.2	917.2	1.46991	1.02012
302	1311.4	965.4	1.3584	0.942736
307	1232.2	829.8	1.48494	1.03055
312	1267.4	809	1.56663	1.08725
317	1324.6	871.2	1.52043	1.05519
322	1256	873	1.43872	0.998476
327	1265.4	817.4	1.54808	1.07437
332	1425.4	1007.6	1.41465	0.981773
337	1266.4	920.6	1.37562	0.95469
342	1328.8	923.8	1.43841	0.998261
347	1297.4	844.4	1.53648	1.06632
352	1489.6	1014.4	1.46845	1.01911
357	1358	924.4	1.46906	1.01954
362	1258	827.8	1.51969	1.05467
367	1184.2	809.6	1.4627	1.01512
372	1322	974.8	1.35618	0.941192
377	1257.8	847.4	1.4843	1.03011
382	1331.2	971.6	1.37011	0.950864
387	1371.2	905.4	1.51447	1.05105
392	1185.4	821.6	1.44279	1.00131
397	1256	846	1.48463	1.03034
402	1290.6	904	1.42765	0.990799
407	1197	815.8	1.46727	1.01829
412	1182.2	833.8	1.41785	0.983992
417	1268.4	851.8	1.48908	1.03343
422	1212.2	865	1.40139	0.972569
427	1225	860	1.42442	0.988553
432	1221.6	835.8	1.46159	1.01435
437	1254.8	881.4	1.42364	0.988016
442	1294.2	903.4	1.43259	0.994223
447	1274.2	832.4	1.53075	1.06235
452	1197.4	828.2	1.44579	1.00338
457	1231.4	845.8	1.4559	1.0104
462	1242.2	805.4	1.54234	1.07039
467	1247.2	799.8	1.55939	1.08222
472	1309.4	866	1.51201	1.04934
477	1346.8	850.4	1.58373	1.09911
482	1280.8	839	1.52658	1.05945
487	1267.6	850.2	1.49094	1.03472
492	1259.8	838.8	1.50191	1.04233
497	1283.8	849.4	1.51142	1.04893
			1.44091
