# Supplementary material for: High-resolution mapping demonstrates inhibition of DNA excision repair by transcription factors
Source: eLife. 2022 Mar 15;11:e73943. doi: 10.7554/eLife.73943 (PMC8970589; doi:10.7554/eLife.73943)
Supplement: Figure 1—source data 2. [file elife-73943-fig1-data2.xlsx]

## Sheet: Reb1High_two_strands_G_formatio
Distance_to_TFBS_center	7meG_count_Reb1High_mag1_0h	7meG_count_Reb1High_naked_DNA	Cell_to_naked_7meG_ratio	Scaled
-498	1471.8	917.2	1.60467	1.11864
-493	1385	953.8	1.45209	1.01228
-488	1381.4	911.6	1.51536	1.05638
-483	1438	952.8	1.50924	1.05212
-478	1454.6	955.4	1.5225	1.06136
-473	1423	1019.6	1.39565	0.972929
-468	1360	931.6	1.45985	1.01769
-463	1432	972.4	1.47265	1.02661
-458	1420	982.8	1.44485	1.00723
-453	1422.2	960.8	1.48022	1.03189
-448	1453.4	982	1.48004	1.03176
-443	1351.8	959.4	1.40901	0.982243
-438	1447.4	979	1.47845	1.03065
-433	1385.6	960.4	1.44273	1.00575
-428	1452.4	1024.6	1.41753	0.988184
-423	1397.8	961	1.45453	1.01398
-418	1534.8	1037.4	1.47947	1.03136
-413	1418.6	1006.2	1.40986	0.982838
-408	1398.2	999.6	1.39876	0.9751
-403	1359	927.2	1.4657	1.02177
-398	1510.2	995.8	1.51657	1.05723
-393	1461.8	1070.4	1.36566	0.952024
-388	1422.6	1031	1.37983	0.961901
-383	1359.6	1003.8	1.35445	0.944213
-378	1445.2	1016.4	1.42188	0.991218
-373	1329.4	894.8	1.4857	1.0357
-368	1369.4	957.6	1.43003	0.996902
-363	1462.8	1025	1.42712	0.994872
-358	1402.6	1009.8	1.38899	0.968288
-353	1327.8	901.8	1.47239	1.02643
-348	1390.6	986.4	1.40977	0.982778
-343	1454.4	1063.2	1.36795	0.953619
-338	1428.4	996.6	1.43327	0.99916
-333	1488.4	1012.4	1.47017	1.02488
-328	1369.6	897.4	1.52619	1.06393
-323	1400.8	980.8	1.42822	0.995639
-318	1403.6	1017	1.38014	0.962118
-313	1462.2	995.2	1.46925	1.02424
-308	1468.4	1001.8	1.46576	1.02181
-303	1423.6	986.8	1.44264	1.00569
-298	1415.6	958.8	1.47643	1.02924
-293	1443.4	964.6	1.49637	1.04315
-288	1479.2	988.6	1.49626	1.04307
-283	1369.2	961.8	1.42358	0.992403
-278	1450.2	958.2	1.51346	1.05506
-273	1559.4	1200.6	1.29885	0.905452
-268	1418.4	939.6	1.50958	1.05235
-263	1388	976	1.42213	0.991393
-258	1410	939	1.5016	1.04679
-253	1394.8	1010.6	1.38017	0.962141
-248	1469.6	1021.4	1.43881	1.00302
-243	1500	1170	1.28205	0.893741
-238	1306.4	886.4	1.47383	1.02743
-233	1404.6	976.2	1.43884	1.00304
-228	1437.2	1021.4	1.40709	0.980906
-223	1443.6	992	1.45524	1.01447
-218	1460.2	1029.2	1.41877	0.989051
-213	1398.2	959	1.45798	1.01638
-208	1344.2	1072.8	1.25298	0.873476
-203	1432	982.8	1.45706	1.01574
-198	1424.8	964	1.47801	1.03035
-193	1329.2	920.8	1.44353	1.00631
-188	1404.6	1003.8	1.39928	0.975465
-183	1436	1049	1.36892	0.9543
-178	1402.6	984	1.42541	0.993676
-173	1502	986.4	1.52271	1.06151
-168	1480.4	997.8	1.48366	1.03429
-163	1383	928.4	1.48966	1.03847
-158	1464.8	1042	1.40576	0.979979
-153	1481	1020.8	1.45082	1.01139
-148	1473.4	941	1.56578	1.09153
-143	1496.4	985.2	1.51888	1.05884
-138	1411.6	987.4	1.42961	0.996609
-133	1482.8	1029	1.44101	1.00455
-128	1404.6	889.4	1.57927	1.10093
-123	1403.2	944.4	1.48581	1.03579
-118	1361.6	878	1.5508	1.08109
-113	1388.4	917	1.51407	1.05548
-108	1457.2	999.6	1.45778	1.01625
-103	1481.8	999.8	1.4821	1.0332
-98	1369	962	1.42308	0.992052
-93	1492	970.2	1.53783	1.07205
-88	1476	1042.8	1.41542	0.986714
-83	1443.4	976.8	1.47768	1.03012
-78	1500.8	1062.2	1.41292	0.984969
-73	1505	1034.2	1.45523	1.01447
-68	1523.2	1042	1.4618	1.01905
-63	1327.8	941	1.41105	0.983669
-58	1371.4	932.6	1.47051	1.02512
-53	1445	1009	1.43211	0.99835
-48	1402.2	1002.4	1.39884	0.975158
-43	1365	986.4	1.38382	0.964685
-38	1359.2	948	1.43376	0.999496
-33	1513.6	1083.2	1.39734	0.974111
-28	1239.8	867.4	1.42933	0.996411
-23	1351.4	981	1.37757	0.960331
-18	1344.4	984.4	1.3657	0.952057
-13	1542.2	1039.4	1.48374	1.03434
-8	1378.4	1009.2	1.36583	0.952147
-3	534	512.2	1.04256	0.726788
2	1274.4	2938.6	0.433676	0.302323
7	1494	1047.6	1.42612	0.994171
12	1293.2	921.4	1.40352	0.978416
17	1263.4	978.8	1.29076	0.899815
22	1325.2	963	1.37612	0.959315
27	1300.8	881.6	1.4755	1.0286
32	1278.6	1014.6	1.2602	0.878508
37	1274.4	974.6	1.30761	0.91156
42	1266.4	895	1.41497	0.986402
47	1250.4	945.6	1.32234	0.921823
52	1369.2	1007.8	1.3586	0.947106
57	1317.8	887.6	1.48468	1.035
62	1294.6	962.2	1.34546	0.937943
67	1270.2	935.2	1.35821	0.946834
72	1344.8	948.6	1.41767	0.988282
77	1373.4	955.6	1.43721	1.00191
82	1438	1032.4	1.39287	0.970995
87	1391.2	899	1.5475	1.07879
92	1445.4	970	1.4901	1.03878
97	1453.6	1006.4	1.44436	1.00689
102	1575	1074.6	1.46566	1.02174
107	1501	1020.8	1.47042	1.02505
112	1440.6	1033	1.39458	0.972186
117	1527.6	1086.6	1.40585	0.980045
122	1441	909.6	1.58421	1.10438
127	1681	1158.4	1.45114	1.01162
132	1453	1004.8	1.44606	1.00807
137	1409	961.4	1.46557	1.02168
142	1431.2	956.8	1.49582	1.04276
147	1384.6	906.4	1.52758	1.0649
152	1437.4	1004.8	1.43053	0.99725
157	1401.8	1027.6	1.36415	0.950973
162	1539	1149.2	1.33919	0.933575
167	1403.6	966.4	1.4524	1.01249
172	1392.6	897.8	1.55112	1.08132
177	1439.2	936.4	1.53695	1.07144
182	1501	1004.2	1.49472	1.042
187	1448.6	1020	1.4202	0.990044
192	1620.8	1150.6	1.40866	0.981999
197	1441.8	973.4	1.4812	1.03257
202	1374.4	969	1.41837	0.98877
207	1541.6	1104	1.39638	0.973439
212	1527.2	1038.4	1.47072	1.02527
217	1618.4	1105.2	1.46435	1.02082
222	1486.8	1050.8	1.41492	0.986367
227	1442	1006.2	1.43311	0.99905
232	1443.8	1025	1.40859	0.98195
237	1549	1082	1.43161	0.997999
242	1454	1041.6	1.39593	0.973127
247	1645.2	1124.6	1.46292	1.01983
252	1338	904.8	1.47878	1.03088
257	1432.6	995.2	1.43951	1.00351
262	1383.8	953.2	1.45174	1.01203
267	1392.6	982.2	1.41784	0.9884
272	1452	1001	1.45055	1.0112
277	1392.2	977.6	1.4241	0.992765
282	1429.6	975	1.46626	1.02215
287	1425.6	1006.4	1.41653	0.987491
292	1511.4	1037	1.45747	1.01603
297	1446	977.2	1.47974	1.03155
302	1456	989	1.47219	1.02629
307	1430.6	1016.2	1.40779	0.981398
312	1522	1049.2	1.45063	1.01126
317	1446	972.8	1.48643	1.03622
322	1484.4	1037.4	1.43088	0.997495
327	1623	1100.6	1.47465	1.028
332	1479.6	1129.2	1.31031	0.913439
337	1466.4	990.6	1.48031	1.03195
342	1483.6	1010.6	1.46804	1.0234
347	1590.6	1053.6	1.50968	1.05243
352	1460.4	1010	1.44594	1.00799
357	1567.8	1079.2	1.45274	1.01273
362	1534.4	1075.8	1.42629	0.99429
367	1494.2	1020.2	1.46461	1.02101
372	1450	1053.2	1.37676	0.959761
377	1511.8	1052.8	1.43598	1.00105
382	1487	1035.2	1.43644	1.00137
387	1479	1022.4	1.4466	1.00845
392	1566.6	1168.4	1.34081	0.934701
397	1527	1032.8	1.47851	1.03069
402	1359.6	982	1.38452	0.965174
407	1524.2	1037.8	1.46868	1.02385
412	1450.8	1074	1.35084	0.941693
417	1451	1030.6	1.40792	0.981484
422	1497	1060.8	1.4112	0.983772
427	1490	1026.2	1.45196	1.01219
432	1570.8	1076.4	1.45931	1.01731
437	1505.4	1011.2	1.48873	1.03782
442	1511	1036.6	1.45765	1.01615
447	1468.8	1040.8	1.41122	0.983788
452	1571.6	1077	1.45924	1.01726
457	1476.6	1036.6	1.42446	0.993019
462	1476.2	984.2	1.4999	1.04561
467	1497.2	1030	1.45359	1.01332
472	1645.2	1100.2	1.49536	1.04245
477	1487	991.2	1.5002	1.04582
482	1408.2	958	1.46994	1.02472
487	1513.2	1027.4	1.47284	1.02675
492	1563.2	1075	1.45414	1.01371
497	1555.4	1090.6	1.42619	0.99422
			1.43448
