# Supplementary material for: High-resolution mapping demonstrates inhibition of DNA excision repair by transcription factors
Source: eLife. 2022 Mar 15;11:e73943. doi: 10.7554/eLife.73943 (PMC8970589; doi:10.7554/eLife.73943)
Supplement: Figure 2—source data 1. [file elife-73943-fig2-data1.xlsx]

## Sheet: WT-Abf1_antiparallel_5bpmean
Distance		7meg_Count_Abf1_mag1_0h		7meg_Count_Abf1_WT_2h	count_2h / count_0h
-498		1230.4		738.6	0.600293
-493		1199.2		758.2	0.632255
-488		1214.4		803.4	0.661561
-483		1285.8		794.8	0.618137
-478		1254.8		772	0.615237
-473		1229.4		778.6	0.633317
-468		1246.6		738.8	0.592652
-463		1255.8		774.2	0.616499
-458		1215.2		786.8	0.647465
-453		1254.4		764	0.609056
-448		1222.6		721.4	0.590054
-443		1247.2		745.2	0.597498
-438		1196.8		732.4	0.611965
-433		1246		743.2	0.596469
-428		1243.2		694.4	0.558559
-423		1299.2		742.6	0.571583
-418		1169.8		673.8	0.575996
-413		1276.4		688.4	0.539329
-408		1233.8		681	0.551953
-403		1199.4		682.6	0.569118
-398		1247.2		689.4	0.552758
-393		1274.6		716.4	0.562059
-388		1217.2		692.2	0.568682
-383		1218.4		684	0.561392
-378		1231		665.2	0.540374
-373		1267.6		683.6	0.539287
-368		1226.4		708	0.577299
-363		1256.4		718.4	0.571792
-358		1193.4		702.4	0.58857
-353		1215.8		700.2	0.575917
-348		1249.4		761.2	0.609252
-343		1221.8		732.6	0.599607
-338		1266		758.6	0.59921
-333		1164.6		743.2	0.638159
-328		1236.8		778.4	0.629366
-323		1270.6		821.4	0.646466
-318		1289.6		829	0.642835
-313		1255.4		796.6	0.634539
-308		1326		829.4	0.62549
-303		1293.8		840.4	0.649559
-298		1323.2		833	0.629534
-293		1266.2		759.6	0.599905
-288		1280.2		795	0.620997
-283		1208.6		722.4	0.597716
-278		1263.8		748	0.591866
-273		1233		748	0.60665
-268		1268.4		742.4	0.585304
-263		1198.8		675	0.563063
-258		1257.4		683	0.543184
-253		1223.2		692.2	0.565893
-248		1193.6		641	0.537031
-243		1236.2		679.8	0.549911
-238		1227.8		659.4	0.537058
-233		1163.2		620.8	0.5337
-228		1214.2		617.2	0.508318
-223		1152.2		624	0.541573
-218		1170		632.8	0.540855
-213		1184.8		621.4	0.524477
-208		1172.8		658.2	0.561221
-203		1134.2		632.4	0.557574
-198		1149.6		643.4	0.559673
-193		1205.2		655.2	0.543644
-188		1205.2		708.8	0.588118
-183		1197.6		706.8	0.59018
-178		1120.2		673.4	0.601143
-173		1152.2		715.2	0.620726
-168		1186.6		757.4	0.638294
-163		1164.8		755.2	0.648352
-158		1167.6		757.2	0.64851
-153		1265.6		776.4	0.613464
-148		1187.6		753.8	0.634725
-143		1277.6		828.2	0.648247
-138		1395.4		865.2	0.620037
-133		1206.8		764.4	0.633411
-128		1172.2		737.8	0.629415
-123		1184.4		720	0.607903
-118		1169.8		739.8	0.632416
-113		1150.8		689.8	0.599409
-108		1277		669.6	0.524354
-103		1224.8		686	0.560091
-98		1089.4		612.8	0.562511
-93		1164.8		644.4	0.553228
-88		1130		564	0.499115
-83		1128.6		593.6	0.525961
-78		986		484.6	0.491481
-73		1068		546	0.511236
-68		1037.4		465.6	0.448814
-63		963		446.2	0.463344
-58		1015.8		419.6	0.413073
-53		935		406	0.434225
-48		1021.8		422	0.412997
-43		961.2		379.2	0.394507
-38		906.6		354.4	0.390911
-33		989.4		356.2	0.360016
-28		914.6		381.4	0.417013
-23		1011		417.6	0.413056
-18		918.6		367	0.399521
-13		1033		440.2	0.426137
-8		1213		746.6	0.615499
-3		1540		938.75	0.609578
2		775.8		480.6	0.61949
7		844.75		466	0.551642
12		999		488.4	0.488889
17		977.2		330.6	0.338314
22		1045.6		394	0.376817
27		980.6		372.6	0.379971
32		1083.2		415	0.383124
37		1025.4		432.6	0.421884
42		972.2		379.4	0.390249
47		1031		437.6	0.424442
52		1051.8		422.6	0.401787
57		937.6		425.4	0.453712
62		1144		533.4	0.466259
67		1229		512.8	0.41725
72		1145		536.8	0.468821
77		1159.2		527.6	0.455141
82		1282.8		671.8	0.523698
87		1135.6		604.2	0.532054
92		1287		706.6	0.549029
97		1354.2		712.4	0.526067
102		1343.8		746.6	0.555589
107		1346.6		775	0.575524
112		1331.6		770	0.578252
117		1352.8		810.8	0.599349
122		1372.2		812.4	0.592042
127		1209		767.2	0.634574
132		1206.8		752.4	0.623467
137		1361.8		850.8	0.624761
142		1304.6		809.8	0.620727
147		1208.6		780.8	0.646037
152		1294.6		834.2	0.644369
157		1385.6		823.6	0.5944
162		1268.8		753.6	0.593947
167		1199		724.4	0.60417
172		1215		702	0.577778
177		1264.4		696.8	0.551091
182		1298.8		719.2	0.553742
187		1258.4		695.4	0.552606
192		1203.4		699.6	0.581353
197		1268.4		663.6	0.523179
202		1155.2		608.8	0.527008
207		1270		678.2	0.534016
212		1214.6		643.4	0.529722
217		1357.2		715.2	0.526967
222		1203.2		657	0.546044
227		1231		677	0.549959
232		1302.4		702.2	0.539158
237		1315.8		697	0.529716
242		1196.8		652	0.544786
247		1217.2		642.6	0.527933
252		1319.4		719.6	0.545399
257		1292.4		726	0.561746
262		1305.8		763.6	0.584776
267		1283.8		782.4	0.609441
272		1271.6		763.6	0.600503
277		1261.4		741.8	0.588077
282		1282.8		793.6	0.618647
287		1246.2		770	0.617878
292		1258.4		782.2	0.621583
297		1348.2		828.2	0.614301
302		1311.4		837	0.638249
307		1232.2		790.2	0.641292
312		1267.4		815	0.643049
317		1324.6		841	0.634909
322		1256		779.6	0.620701
327		1265.4		805.8	0.636795
332		1425.4		867.2	0.608391
337		1266.4		766.4	0.60518
342		1328.8		806.2	0.606713
347		1297.4		786.8	0.606444
352		1489.6		859.2	0.576799
357		1358		746.2	0.549485
362		1258		692.2	0.550238
367		1184.2		665.6	0.562067
372		1322		784.4	0.593343
377		1257.8		699.6	0.556209
382		1331.2		715.2	0.53726
387		1371.2		729.8	0.532235
392		1185.4		641.6	0.541252
397		1256		673.4	0.536146
402		1290.6		696.4	0.539594
407		1197		718.8	0.600501
412		1182.2		674.6	0.570631
417		1268.4		719.8	0.567487
422		1212.2		718.4	0.592641
427		1225		706.8	0.57698
432		1221.6		738.2	0.604289
437		1254.8		755.4	0.602008
442		1294.2		802.4	0.619997
447		1274.2		753	0.590959
452		1197.4		776	0.648071
457		1231.4		788	0.639922
462		1242.2		747.6	0.601835
467		1247.2		777.8	0.623637
472		1309.4		802	0.612494
477		1346.8		826.4	0.613603
482		1280.8		790	0.616802
487		1267.6		777.8	0.613601
492		1259.8		777	0.616765
497		1283.8		762.6	0.594018
		242666		137835
				0.568002
