# Supplementary material for: High-resolution mapping demonstrates inhibition of DNA excision repair by transcription factors
Source: eLife. 2022 Mar 15;11:e73943. doi: 10.7554/eLife.73943 (PMC8970589; doi:10.7554/eLife.73943)
Supplement: Figure 2—source data 2. [file elife-73943-fig2-data2.xlsx]

## Sheet: WT_Reb1High_antiparallel_5bpmea
Distance		7meG_Count_Reb1High_mag1_0h		7meG_Count_Reb1High_WT_2h	2h_count / 0h_count
-498		1471.8		827.8	0.562441
-493		1385		816.8	0.589747
-488		1381.4		808.6	0.585348
-483		1438		852.4	0.592768
-478		1454.6		891.6	0.612952
-473		1423		845.2	0.593956
-468		1360		842	0.619118
-463		1432		885.6	0.618436
-458		1420		866.8	0.610423
-453		1422.2		850.6	0.598087
-448		1453.4		885.6	0.60933
-443		1351.8		831.8	0.615328
-438		1447.4		873.4	0.603427
-433		1385.6		812.6	0.586461
-428		1452.4		827.4	0.569678
-423		1397.8		785	0.561597
-418		1534.8		813.6	0.530102
-413		1418.6		789.2	0.556323
-408		1398.2		758.8	0.542698
-403		1359		738.8	0.543635
-398		1510.2		766.8	0.507747
-393		1461.8		809.6	0.553838
-388		1422.6		799.8	0.56221
-383		1359.6		841.2	0.618711
-378		1445.2		760.4	0.526156
-373		1329.4		746.8	0.561757
-368		1369.4		795	0.580546
-363		1462.8		841.8	0.575472
-358		1402.6		809.6	0.577214
-353		1327.8		775.2	0.583823
-348		1390.6		798.6	0.574284
-343		1454.4		873.8	0.600798
-338		1428.4		863.4	0.604453
-333		1488.4		903.2	0.606826
-328		1369.6		829.6	0.605724
-323		1400.8		859.2	0.613364
-318		1403.6		890.4	0.634369
-313		1462.2		911.8	0.623581
-308		1468.4		890.4	0.606374
-303		1423.6		873.4	0.613515
-298		1415.6		862.4	0.609212
-293		1443.4		908.4	0.629347
-288		1479.2		925.8	0.625879
-283		1369.2		824.6	0.602249
-278		1450.2		823.6	0.567922
-273		1559.4		957.4	0.613954
-268		1418.4		790.4	0.557248
-263		1388		760	0.54755
-258		1410		819	0.580851
-253		1394.8		739.6	0.530255
-248		1469.6		791	0.538242
-243		1500		788.4	0.5256
-238		1306.4		708.4	0.542254
-233		1404.6		755.4	0.537804
-228		1437.2		755	0.525327
-223		1443.6		749.2	0.51898
-218		1460.2		792.8	0.542939
-213		1398.2		772.4	0.552425
-208		1344.2		771.4	0.573873
-203		1432		812	0.567039
-198		1424.8		793.2	0.55671
-193		1329.2		748.2	0.562895
-188		1404.6		823	0.585932
-183		1436		854.4	0.594986
-178		1402.6		822.2	0.586197
-173		1502		837	0.557257
-168		1480.4		881.6	0.595515
-163		1383		825.6	0.596963
-158		1464.8		868.6	0.592982
-153		1481		873.8	0.590007
-148		1473.4		865.4	0.587349
-143		1496.4		909.4	0.607725
-138		1411.6		915.8	0.648767
-133		1482.8		885.8	0.597383
-128		1404.6		857	0.610138
-123		1403.2		821	0.585091
-118		1361.6		802.6	0.589454
-113		1388.4		772.8	0.556612
-108		1457.2		821.8	0.563958
-103		1481.8		859.2	0.579835
-98		1369		729.6	0.532944
-93		1492		805.6	0.539946
-88		1476		770.4	0.521951
-83		1443.4		740.6	0.513094
-78		1500.8		739.8	0.492937
-73		1505		805.4	0.53515
-68		1523.2		667.2	0.438025
-63		1327.8		584.6	0.440277
-58		1371.4		641.6	0.467843
-53		1445		622.2	0.430588
-48		1402.2		585.4	0.417487
-43		1365		575.4	0.421538
-38		1359.2		579	0.425986
-33		1513.6		635.8	0.420058
-28		1239.8		492	0.396838
-23		1351.4		545.6	0.403729
-18		1344.4		561.4	0.417584
-13		1542.2		697.2	0.452081
-8		1378.4		879	0.637696
-3		1335		738.5	0.553184
2		1274.4		1088.6	0.854206
7		1494		1002.4	0.67095
12		1293.2		666.8	0.51562
17		1263.4		469.4	0.371537
22		1325.2		522.6	0.394356
27		1300.8		501.2	0.385301
32		1278.6		539.4	0.421868
37		1274.4		540.2	0.423886
42		1266.4		520.6	0.411087
47		1250.4		565.6	0.452335
52		1369.2		593.4	0.433392
57		1317.8		578.4	0.438913
62		1294.6		571.6	0.441526
67		1270.2		561.4	0.441978
72		1344.8		651.8	0.484682
77		1373.4		636.2	0.46323
82		1438		682.2	0.474409
87		1391.2		683.4	0.491231
92		1445.4		783	0.541719
97		1453.6		785.2	0.540176
102		1575		851.6	0.540698
107		1501		800.8	0.533511
112		1440.6		831	0.576843
117		1527.6		863.6	0.565331
122		1441		822.8	0.570992
127		1681		951.4	0.565973
132		1453		816.8	0.562147
137		1409		827.6	0.587367
142		1431.2		853.6	0.596423
147		1384.6		845.6	0.610718
152		1437.4		857.4	0.596494
157		1401.8		879.2	0.627194
162		1539		879.2	0.57128
167		1403.6		851	0.606298
172		1392.6		774	0.555795
177		1439.2		812	0.564202
182		1501		862.8	0.574817
187		1448.6		845.8	0.583874
192		1620.8		871.2	0.537512
197		1441.8		774	0.536829
202		1374.4		798.8	0.581199
207		1541.6		860.2	0.557992
212		1527.2		845.8	0.553824
217		1618.4		808.8	0.499753
222		1486.8		794	0.534033
227		1442		731.2	0.507074
232		1443.8		768.6	0.532345
237		1549		821.4	0.530278
242		1454		773.4	0.531912
247		1645.2		849	0.516047
252		1338		742.6	0.555007
257		1432.6		783.8	0.547117
262		1383.8		757.8	0.547622
267		1392.6		764	0.548614
272		1452		845.6	0.582369
277		1392.2		825.6	0.593018
282		1429.6		824.6	0.576805
287		1425.6		850.6	0.596661
292		1511.4		896.6	0.593225
297		1446		894.8	0.618811
302		1456		906.4	0.622527
307		1430.6		871	0.608835
312		1522		908.6	0.596978
317		1446		904.4	0.62545
322		1484.4		892.8	0.601455
327		1623		995	0.613062
332		1479.6		925.2	0.625304
337		1466.4		872.2	0.59479
342		1483.6		902.6	0.608385
347		1590.6		951	0.597888
352		1460.4		841.2	0.576007
357		1567.8		860.2	0.548667
362		1534.4		881	0.574166
367		1494.2		812.8	0.54397
372		1450		848.2	0.584966
377		1511.8		845.6	0.559333
382		1487		800.2	0.53813
387		1479		815.2	0.551183
392		1566.6		880	0.561726
397		1527		845.4	0.553635
402		1359.6		797.2	0.586349
407		1524.2		824.2	0.540743
412		1450.8		810.8	0.558864
417		1451		827.4	0.570227
422		1497		842.4	0.562725
427		1490		856.2	0.574631
432		1570.8		902.8	0.574739
437		1505.4		847.2	0.562774
442		1511		845.8	0.559762
447		1468.8		866.2	0.589733
452		1571.6		908	0.577755
457		1476.6		875	0.592578
462		1476.2		874.2	0.592196
467		1497.2		913.8	0.610339
472		1645.2		979.2	0.595186
477		1487		879.4	0.591392
482		1408.2		865	0.614259
487		1513.2		914.2	0.60415
492		1563.2		946	0.605169
497		1555.4		904.6	0.581587
